# Supplementary material for: Stable centrosomal roots disentangle to allow interphase centriole independence
Source: PLoS Biol. 2018 Apr 12;16(4):e2003998. doi: 10.1371/journal.pbio.2003998 (PMC5918241; doi:10.1371/journal.pbio.2003998)
Supplement: S1 Data — (XLSX) [file pbio.2003998.s015.xlsx]

## Sheet: Fig 1
Fig 1D
Classification	4 Centrin Foci	2 Centrin Foci
	24.8886	10.1207
	19.7213	51.2172
	47.1951	30.9311
	49.7271	10.2424
	32.6679	47.0524
	1.05367	14.9212
	36.5263	36.417
	23.6748	0.132097
	44.7181	28.1087
	44.464	0.439979
	30.6849	16.9347
	32.8644	37.337
	14.6306	31.6646
	29.373	37.9485
	26.2779	56.538
	8.80641	28.5921
	18.8264	61.2824
	34.1744	17.4725
	26.7461	34.2977
	27.1564	24.6293
	24.7849	16.7466
	31.657	5.17159
	7.30645
Fig 1C
	10.962
	9.16667
	10.8488
	16.9021
	9.46448
	4.04412
	6.91722
	17.1198
	7.165
	21.478
	13.4893
	11.362
	16.7281
	6.95361
	10.8436
	1
	11.7346
	1
	12.648
	26.7006
	14.7056
Fig 1G
	bi2536	STLC
	0.702645	2.41023
	0.654985	1.24324
	0.782986	1.86555
	0.309109	0.693113
	0.509281	1.21056
	0.211066	1.03082
	0.551494	1.58231
	0.32545	0.834731
	0.533792	0.663155
	1.25822	0.582814
	0.499749	1.12341
	0.0422131	0.74622
	0.52426	0.559665
	0.467068	0.641367
		0.660431
		1.02537
		0.720347
		0.874221
		0.53243

## Sheet: Fig 3
Fig 3J
Classification	Distance (um)
Split		0.685692	0.590729	3.99186	1.6	12.4904	1.7061	3.21369	3.64471	2.05994	10.9455	2.98412	2.00443	5.4	4.7	4.11625	4.43035	7.83949	3.36526	4.68083	3.17452	5.27124	7.96394	1.5	2.14677	6.09233	4.41097	2.073	2.68839	14.3463	2.51444	2.13255	2.2	5.91122	1.60068	4.05505	13.7431	4.3624	1.66098	2.56991	5.10488	4.64907	1.93351	2.03048	1.99802	4.07704	5.20167	0.720257	2.65814
Cohered		0.620249	0.706318	0.639966	0.498581	0.762348	0.563954	0.782043	0.669411	0.998572	0.937774	0.979453	1.0729	0.5	0.622228	0.640961	0.60455	0.584989	0.658429	0.546768	0	1.77551	0.5	0.7	0.726748	3.90373	0.874017	0.743712	0.6	0.6	1.1	0.593267	0.949338	2.49924	1.4	0.7	0.860565	0.6	0.861139	0.909127	7.01273	0.639227	1.17026	0.525455	2.32752	1.17859	0.8	0.970131	0
Fig 3A
Cell Type	Percent Split	Experiment1	Experiment 2	Experiment 3
BJ-5TA		12.91	7.86
U2OS		7.37	9.5
PANC-1		14.4	13.02
Cal51		11.6	30.8	21.3
HPNE		22.9	10.56	15.25
RPE		10.6	10.44
HeLa KY		48.48	50.65
Fig 3F
Classification	Centrosome count per cell
Untransfected	1	1	1	1	1	1	1	1	1	1	1	1	1	1	1	1	1	1	1	1	1	1	1	1	1	1	1	1	1	1	1	1	1	1	1	1	1	1	1	1	1	1	1	1	1	1	1	1	1
+GFP-rootletin	1	1	1	1	1	1	1	1	1	1	1	1	1	1	1	1	1	1	1	1	1	1	1	1	1	1	1	1	1	1	1	1	1	1	1	1	1	1	1	1	1	1	1	1	1	1	1	1	1
[truncated: 3,194 more columns]

## Sheet: Fig 4
Fig 4C
Classification	CEP164 +ve	CEP164 -ve
PCNT Intensity (AU)	13.651	13.6784
	14	14.2078
	50.498	58.0235
	11.7686	19.2157
	105.655	103.741
	38.6118	17.498
	11.4863	10.5216
	48.5647	48.9882
	38.9647	50.5451
	57.898	59.7765
	85.051	78.7608
	32.7294	43.051
	51.6235	67.8706
	58.7961	48.5922
	51.6039	55.8549
	15.9843	18.1843
	24.0353	15.9961
	19.8314	10.3608
	60.3961	63.7373
	23.5216	22.0784
	54.349	47.1373
Fig 4A
Classification	Cohered	Split
Rootletin Area (AU)	0.268752	0.0706891
	0.449476	0.11437
	0.467482	0.278088
	0.557177	0.279755
	0.577516	0.338441
	0.590187	0.342775
	0.606526	0.359114
	0.647205	0.426802
	0.66221	0.488488
	0.680549	0.503493
	0.698888	0.522833
	0.751572	0.533502
	0.751905	0.543506
	0.805255	0.602191
	0.824595	0.607526
	0.836599	0.608526
	0.838933	0.612528
	0.879279	0.614195
	0.889949	0.626198
	0.961305	0.642537
	1.02066	0.668545
	1.039	0.678548
	1.051	0.695887
	1.08001	0.703223
	1.08768	0.70389
	1.11635	0.724897
	1.11735	0.729231
	1.13102	0.738901
	1.16404	0.751238
	1.20905	0.753906
	1.22472	0.783915
	1.2634	0.816259
	1.27174	0.90362
	1.2744	1.035
	1.27874	1.06601
	1.30341	1.86526
	1.3771
	1.62018
	1.6822
	1.68553
	2.25705
Fig 4B
Classification	CEP164 +ve	CEP164 -ve
Rootletin Intensity (AU)	34.843	20.4847
	36.6687	0.137194
	17.396	36.8101
	16.0568	16.0372
	22.62	10.8324
	6.7611	17.4507
	12.7414	10.2935
	44.8604	14.4786
	20.9682	26.3896
	0.13164	37.4362
	24.1596	19.5281
	30.2991	1.72041
	20.2725	28.384
	15.6276	34.8329
	46.252	16.259
	46.8821	13.2147
	9.37262	35.768
	22.1585	31.7665
	9.96158	4.53687
	12.7673	21.5105
	35.3142	12.0788
		13.0518
		20.6985

## Sheet: S2 Fig
Fig S2B
Time relative to bleach	Distance (um)	Intensity (AU)
-20	0	60.1667
	0.07814	59.9167
	0.15629	57.3333
	0.23443	54.8333
	0.31257	52.9167
	0.39071	51.3333
	0.46886	49.9167
	0.547	51.25
	0.62514	52.4167
	0.70328	60.5833
	0.78143	57.5833
	0.85957	54.5
	0.93771	53
	1.01585	49.6667
	1.094	47.1667
	1.17214	47.5833
	1.25028	48.3333
	1.32843	48.9167
	1.40657	48.4167
	1.48471	40
	1.56285	41.5833
	1.641	48
	1.71914	47.25
	1.79728	45.0833
	1.87542	51.5833
	1.95357	53.6667
	2.03171	55.3333
	2.10985	60.6667
	2.18799	64.6667
	2.26614	61.25
	2.34428	62.8333
	2.42242	66.0833
	2.50057	68.8333
	2.57871	71
	2.65685	68
	2.73499	64.5833
	2.81314	58.5
	2.89128	57.1667
0	0	53.6667
	0.07814	55
	0.15629	62.3333
	0.23443	64
	0.31257	63.8333
	0.39071	58.3333
	0.46886	56.1667
	0.547	55.1667
	0.62514	53.25
	0.70328	54.4167
	0.78143	53.1667
	0.85957	48.75
	0.93771	48.4167
	1.01585	35.0833
	1.094	29.5833
	1.17214	27.5
	1.25028	18.5833
	1.32843	11.0833
	1.40657	8.6667
	1.48471	6.75
	1.56285	6.1667
	1.641	7.5833
	1.71914	8.9167
	1.79728	11.6667
	1.87542	13.5
	1.95357	15.5833
	2.03171	20.8333
	2.10985	30.1667
	2.18799	38.25
	2.26614	39.1667
	2.34428	41.25
	2.42242	50.4167
	2.50057	52.6667
	2.57871	59.8333
	2.65685	58.5833
	2.73499	58.5
	2.81314	58.5
	2.89128	61.0833
320	0	58.75
	0.07814	57.8333
	0.15629	61.3333
	0.23443	52.3333
	0.31257	57.75
	0.39071	55.4167
	0.46886	49.25
	0.547	49.75
	0.62514	60
	0.70328	55.5833
	0.78143	52.5833
	0.85957	42.8333
	0.93771	36.5833
	1.01585	31.6667
	1.094	23.25
	1.17214	14.1667
	1.25028	11.4167
	1.32843	13
	1.40657	14.4167
	1.48471	11
	1.56285	10.6667
	1.641	11.9167
	1.71914	15.75
	1.79728	17
	1.87542	21.75
	1.95357	27.8333
	2.03171	35.9167
	2.10985	38.5833
	2.18799	40.6667
	2.26614	52.0833
	2.34428	58.6667
	2.42242	60.5
	2.50057	55.8333
	2.57871	58.3333
	2.65685	63.6667
	2.73499	67.3333
	2.81314	73.25
	2.89128	68.3333
820	0	51.1667
	0.07814	53.1667
	0.15629	54.25
	0.23443	52.0833
	0.31257	51.25
	0.39071	52.6667
	0.46886	61.75
	0.547	59.8333
	0.62514	48.9167
	0.70328	41.25
	0.78143	38.5833
	0.85957	39.0833
	0.93771	31.5833
	1.01585	24.25
	1.094	16.4167
	1.17214	12.6667
	1.25028	12.5833
	1.32843	11.1667
	1.40657	11
	1.48471	11.5833
	1.56285	10.25
	1.641	11.0833
	1.71914	16.9167
	1.79728	18.8333
	1.87542	22.25
	1.95357	27.8333
	2.03171	33.4167
	2.10985	46
	2.18799	48.75
	2.26614	52.1667
	2.34428	54.3333
	2.42242	59.9167
	2.50057	61.25
	2.57871	54.25
	2.65685	53.0833
	2.73499	53.6667
	2.81314	54.5833
	2.89128	56.8333

## Sheet: S4 Fig
Rootletin	ODF2	CNAP1	nt	-ve
0.016881	0.0211628	0.0276944	0.0149019	0.0109586
0.0154208	0.00518329	0.00665496	0.00128058	0.0133429
0.00547327	0.00804087	0.00872396	0.0108077	0.00850436
0.00855602	0.0144573	0.00192402	0.0159024	0.0134208
0.00671288	0.010753	0.00693255	0.0211102	0.00956237
0.00171972	0.0243596	0.00276769	0.0091574	0.0045003
0.0105883	0.00466605	0.00912646	0.0113206	0.00863324
0.00677837	0.0149884	0.00478828	0.0169789	0.0126421
0.00490136	0.0172864	0.0085581	0.0104593	0.063392
0.00796809	0.0108839	0.00720537	0.0201029	0.00486921
0.00404723	0.0116128	0.00398504	0.00707282	0.00713166
0.00602417	0.00783949	0.00335337	0.015257	0.00605375
0.00368236	0.0214245	0.00413783	0.0204323	0.0149283
0.00829215	0.0168473	0.00368629	0.0386629	0.0292784
0.00691465	0.00548369	0.00927809	0.00586297	0.0150065
0.0173115	0.0108492	0.00915626	0.00546034	0.0162597
0.00572518	0.00894179	0.00629452	0.0156367	0.015742
0.00605967	0.00838136	0.0108874	0.0143008	0.0112459
0.0085251	0.00380075	0.00308284	0.0155501	0.00978333
0.00537642	0.0127295	0.0107402	0.00124042	0.012434
0.00755536	0.0095003	0.0226119	0.0109395	0.0126142
0.00212786	0.0113618	0.0065257	0.0157974	0.0106525
0.00551244	0.00741383	0.0145008	0.00332647	0.0112883
0.00842093	0.013006	0.00454246	0.00464758	0.0107504
0.00315878	0.0131698	0.0105674	0.00600451	0.0335721
0.00796163	0.0134041	0.00611556	0.0126258	0.015505
0.00551025	0.00880874	0.0108034	0.0114119	0.0147394
0.00753107	0.0149988	0.00661777	0.0136582	0.0173103
0.00470146	0.0112937	0.00516123	0.00538967	0.0117024
0.00361718	0.0118209	0.0631201	0.00881463	0.0129913
0.00735466	0.00586852	0.00893577	0.00875359	0.0194452
0.00642154	0.0103271	0.0201688	0.0203756	0.0128021
0.00253521	0.0127246	0.00362289	0.0333464	0.0247105
0.00603337	0.00913067	0.00580415	0.012127	0.00943339
0.00485888	0.0114408	0.00618768	0.0179233	0.0125533
0.0042864	0.00984268	0.00837259	0.013662	0.0143329
0.00923032	0.0216337	0.0101684	0.0194711	0.0070647
0.00398222	0.0101354	0.00305731	0.0138833	0.00756538
0.00543499	0.0102327	0.0037995	0.0121607	0.014015
0.00391017	0.0115324	0.0119803	0.0105088	0.0111306
0.00807299	0.0101593	0.00785056	0.0111027	0.00951621
0.00540055	0.0156498	0.00653366	0.0103373	0.0132636
0.00431409	0.0134359	0.00878334	0.021593	0.0199918
0.00763449	0.0164565	0.00510427	0.0238265	0.00311184
0.0047542	0.0172016	0.00566089	0.00779719	0.0115369
0.00379599	0.0129453	0.0198292	0.0091106	0.0139645
0.00432142	0.0160043	0.00900375	0.00469324	0.0103856
0.00442165	0.0339766	0.0100982	0.0243272	0.0207093
0.0129053	0.0123377	0.0016514	0.0134788	0.0167393
0.0100575	0.0103561	0.00304521	0.014967	0.0129047
0.00817563	0.00822504	0.00295778	0.00801848	0.0110192
0.00573526	0.0117097	0.00209835	0.00876166	0.0117295
0.00428033	0.00922154	0.00686037	0.00210554	0.0188005
0.00711775	0.0176455	0.0104034	0.0371898	0.0102388
0.00597923	0.00988535	0.0116117	0.0235252	0.0173918
0.00415014	0.014177	0.00853101	0.0139982	0.010373
0.00380255	0.00963065	0.0331887	0.0251058	0.0212803
0.00548808	0.0138466	0.00559717	0.0152867	0.0167793
0.00803457	0.00987857	0.00542792	0.00498082	0.0130908
	0.0125629	0.0145953	0.0132855	0.0101716
	0.0119108	0.0033275	0.0112173	0.0272017
	0.0140563	0.00880045	0.0172815	0.0131343
	0.013345	0.00466286	0.0181129	0.0439453
	0.0117601	0.0151324	0.015378	0.0138887
	0.00745702	0.00255427	0.0202595	0.0139759
	0.00773505	0.0039256	0.0140123	0.0149058
	0.0120198	0.00796683	0.0132357	0.0168341
	0.00788977	0.0213634	0.0272396	0.0236551
	0.0100937	0.00549325	0.013653	0.0106855
	0.00946059	0.00797371	0.0145709	0.0146006
	0.00650867	0.00475606	0.0359126	0.0125408
	0.0124436	0.00515583	0.0174452	0.0101644
	0.0171794	0.00903375	0.0129212	0.00665055
	0.0280494	0.00344043	0.0144216	0.00967303
	0.0136426	0.00560672	0.043944	0.0167055
	0.0167795	0.0168891	0.0188986	0.00640387
	0.00967911	0.0227934	0.0103433	0.00921512
	0.00908397	0.00437996	0.0134541	0.00940987
	0.0164006	0.0139497	0.0194199	0.0105499
	0.014473	0.00803	0.0127964	0.00945709
	0.0113906	0.00791063	0.00742786	0.0355
	0.013745	0.00509845	0.0167905	0.0157913
	0.0107449	0.00872482	0.0264101	0.0111433
	0.013077	0.00417376	0.0184094	0.0340683
	0.0158167	0.0117251	0.0103127	0.00694638
	0.0121216	0.0131104	0.014895	0.00709225
	0.00788082	0.00325962	0.0130279	0.00879799
	0.0068574	0.00726019	0.0161704	0.0102263
	0.0156506	0.0286495	0.0141702	0.0137925
	0.0140921	0.00182398	0.00746027	0.0220658
	0.0251819	0.00983408	0.0110653	0.0125821
	0.00629897	0.0147915	0.00706604	0.0247622
	0.00907101	0.00821074	0.0234046	0.00589624
	0.00824081	0.0015194	0.0128909	0.0126145
	0.0229989	0.00459972	0.0028919	0.00491156
	0.00698494	0.00240186	0.0158011	0.0120389
	0.0152415	0.00526737	0.0108507	0.0128564
	0.017957	0.00911658	0.00457628	0.00181678
	0.0117636	0.00268809	0.00654887	0.0315051
	0.00886466	0.013304	0.00966124	0.00949931
	0.00669202	0.00571013	0.0141749	0.00747706
	0.0155027	0.0030905	0.010636	0.00695756
	0.010861	0.0150526	0.0192586	0.0113491
	0.0134063	0.00815119	0.0047866	0.0283489
	0.0109979	0.013166	0.0149028
	0.00924364	0.00179075	0.0176489
	0.0115548	0.0075146	0.00717403
	0.016478	0.00228099	0.00635845
	0.0063815	0.00163202	0.00831339
	0.0101613	0.00425822	0.0103624
	0.0125012	0.00814482	0.0144922
	0.00622282	0.00803612	0.0152776
	0.0202036	0.00433957	0.0115116
	0.0202982	0.00708944	0.00505877
	0.0102463	0.00130772	0.0108453
	0.0155764	0.00565771	0.00884674
	0.00457857	0.00182118	0.00602523
	0.014071	0.00539175	0.0124296
	0.0222099	0.00204699	0.0161716
	0.0141818	0.00353842	0.0135132
	0.0068402	0.0036458	0.00594052
	0.00460614	0.0016556	0.00824803
	0.017028	0.00122717	0.0108314
	0.0140974	0.00730328	0.0181378
	0.00942337	0.00669215	0.0129604
	0.0153353	0.00261377	0.0208712
	0.0126941	0.00790681	0.00377208
	0.0102148	0.0053926	0.00578376
	0.00732884	0.00370144	0.00633374
	0.00441509	0.00561275	0.00554869
	0.00878145	0.00508715	0.00734884
	0.00309181	0.00968931	0.007791
	0.0144152	0.00828917	0.00945033
	0.00352018	0.00545084	0.00622497
	0.00741197	0.00356536
	0.00868073	0.00271423
	0.00900864	0.00412737
	0.0119873	0.0047972
	0.00637303	0.0162645
	0.0327297	0.00486248
	0.00717529	0.00429533
	0.00341952	0.00341879
	0.0106949	0.00494295
	0.00548076
	0.0085773
	0.0102127
	0.0173281
	0.0093166
	0.0116769
	0.0235461
	0.0101044
	0.00944973
	0.00645457
	0.00675181
	0.0343541
	0.00699131
	0.00995238
	0.00601656
	0.0194783
	0.0107081
	0.0121147
	0.0108097
	0.00708853
	0.0155792
	0.0193431
	0.0252649
	0.00871072
	0.00737198
	0.00819548
	0.0107812
	0.00563266
	0.0110354
	0.00854911
	0.013693
	0.0103595
	0.00551723
	0.0190249
	0.0134679
	0.00798834
	0.0101724
	0.0118807
	0.00996414
	0.0109824
	0.00714758
	0.0110637
	0.00950637
	0.0096078
	0.012638
	0.016516
	0.0107528
	0.0112702
	0.0204322
	0.0138388
	0.00797731
	0.0065206
	0.0109941
	0.0150797
	0.0184218
	0.00712373
	0.0101912
	0.0124165
	0.00965348
	0.0103231
	0.00978577
	0.00293908
	0.0113547
	0.0118235
	0.0174362
	0.0112277
	0.00640393
	0.00189351
	0.00832401
	0.0100439
	0.0104037
	0.00814365

## Sheet: S6 Fig
Fig S6B and S6C
Classification	Untransfected	GFP-rootletin
Centrosome count (per cell)	1	1
	1	1
	1	1
	1	1
	1	1
	1	1
	1	1
	1	1
	1	1
	1	1
	1	1
	1	1
	1	1
	1	1
	1	1
	1	1
	1	1
	1	1
	1	1
	1	1
	1	1
	1	1
	1	1
	1	1
	1	1
	1	1
	1	1
	1	1
	1	1
	1	1
	1	1
	1	1
	1	1
	1	1
	1	1
	1	1
	1	1
	1	1
	1	1
	1	1
	1	1
	1	1
	1	1
	1	1
	1	1
	1	1
	1	1
	1	1
	1	1
	1	1
	1	1
	1	1
	1	1
	1	1
	1	1
	1	1
	1	1
	1	1
	1	1
	1	1
	1	1
	1	1
	1	1
	1	1
	1	1
	1	1
	1	1
	1	1
	1	1
	1	1
	1	1
	1	1
	1	1
	1	1
	1	1
	1	1
	1	1
	1	1
	1	1
	1	1
	1	1
	1	1
	1	1
	1	1
	1	1
	1	1
	1	1
	1	1
	1	1
	1	1
	1	1
	1	1
	1	1
	1	1
	1	1
	1	1
	1	1
	1	1
	1	1
	1	1
	1	1
	1	1
	1	1
	1	1
	1	1
	1	1
	1	1
	1	1
	1	1
	1	1
	1	1
	1	1
	1	1
	1	1
	1	1
	1	1
	1	1
	1	1
	1	1
	1	1
	1	1
	1	1
	1	1
	1	1
	1	1
	1	1
	1	1
	1	1
	1	1
	1	1
	1	1
	1	1
	1	1
	1	1
	1	1
	1	1
	1	1
	1	1
	1	1
	1	1
	1	1
	1	1
	1	1
	1	1
	1	1
	1	1
	1	1
	1	1
	1	1
	1	1
	1	1
	1	1
	1	1
	1	1
	1	1
	1	1
	1	1
	1	1
	1	1
	1	1
	1	1
	1	1
	1	1
	1	1
	1	1
	1	1
	1	1
	1	1
	1	1
	1	1
	1	1
	1	1
	1	1
	1	1
	1	1
	1	1
	1	1
	1	1
	1	1
	1	1
	1	1
	1	1
	1	1
	1	1
	1	1
	1	1
	1	1
	1	1
	1	1
	1	1
	1	1
	1	1
	1	1
	1	1
	1	1
	1	1
	1	1
	1	1
	1	1
	1	1
	1	1
	1	1
	1	1
	1	1
	1	1
	1	1
	1	1
	1	1
	1	1
	1	1
	1	1
	1	1
	1	1
	1	1
	1	1
	1	1
	1	1
	1	2
	1	2
	1	2
	1	2
	1	2
	1	2
	1	2
	1	2
	1	2
	1	2
	1	2
	1	2
	1	2
	1	2
	1	2
	1	2
	1	2
	1	2
	1	2
	1	2
	1	2
	1	2
	1	2
	1	2
	1	2
	1	2
	1	2
	1	2
	1	2
	1	2
	1	2
	1	2
	1	2
	1	2
	1	2
	1	2
	1	2
	1	2
	1	2
	1	2
	1	2
	1	2
	1	2
	1	2
	1	2
	1	2
	1	2
	1	2
	1	2
	1	2
	1	2
	1	2
	1	2
	1	2
	1	2
	1	2
	1	2
	1	2
	1	2
	1	2
	1	2
	1	2
	1	2
	1	2
	1	2
	1	2
	1	2
	1	2
	1	2
	1	2
	1	2
	1	2
	1	2
	1	2
	1	2
	1	2
	1	2
	1	2
	1	2
	1	2
	1	2
	1	2
	1	2
	1	2
	1	2
	1	2
	1	2
	1	2
	1	2
	1	2
	1	2
	1	2
	1	2
	1	2
	1	2
	1	2
	1	2
	1	2
	1	2
	1	2
	1	2
	1	2
	1	2
	1	2
	1	2
	1	2
	1	3
	1	3
	1	3
	1	3
	1	3
	1	3
	1	3
	1	3
	1	3
	1	3
	1	3
	1	3
	1	3
	1	3
	1	3
	1	3
	1	3
	1	3
	1	3
	1	3
	1	3
	1	3
	1	3
	2	3
	2	3
	2	3
	2	3
	2	3
	2	3
	2	3
	2	3
	2	3
	2	3
	2	3
	2	3
	2	3
	2	3
	2	3
	2	3
	2	4
	2	4
	2	4
	2	4
	2	4
	2	4
	2	4
	2	4
	2	4
	2	4
	2	4
	2	4
	2
	2
	2
	2
	2
	2
	2
	2
	2
	2
	2
	2
	2
	2
	2
	2
	2
	2
	2
	2
	2
	2
	2
	2
	2
	2
	2
	2
	2
	2
	2
	2
	2
	2
	2
	2
	2
	2
	2
	2
	2
	2
	2
	2
	2
	2
	2
	2
	2
	2
	2
	2
	2
	2
	2
	2
	2
	2
	2
	2
	2
	2
	2
	2
	2
	2
	2
	2
	2
	2
	2
	2
	2
	2
	2
	2
	2
	2
	2
	2
	2
	2
	2
	2
	2
	2
	2
	2
	2
	2
	2
	2
	2
	2
	2
	2
	2
	2
	2
	2
	2
	2
	2
	2
	2
	2
	2
	2
	2
	2
	2
	2
	2
	2
	2
	2
	2
	2
	2
	2
	2
	2
	2
	2
	2
	2
	2
	2
	2
	2
	2
	2
	2
	2
	2
	2
	2
	2
	2
	2
	2
	2
	2
	2
	2
	2
	2
	2
	2
	2
	2
	2
	2
	2
	2
	2
	2
	2
	2
	2
	2
	2
	2
	2
	2
	2
	2
	2
	2
	2
	2
	2
	2
	2
	2
	2
	2
	2
	2
	2
	2
	2
	2
	2
	2
	2
	2
	2
	2
	2
	2
	2
	2
	2
	2
	2
	2
	2
	2
	2
	2
	2
	2
	2
	2
	2
	2
	2
	2
	2
	2
	2
	2
	2
	2
	2
	2
	2
	2
	2
	3
	3
	3
	3
	3
	3
	3
	3
	3
	3
	3
	3
	3
	3
	3
	3
	3
	3
	3
	3
	3
	3
	3
	3
	3
	3
	3
	3
	3
	3
	3
	3
	3
	3
	3
	3
	3
	3
	3
	3
	3
	3
	3
	3
	3
	3
	3
	3
	3
	3
	3
	3
	3
	3
	3
	3
	3
	3
	3
	3
	3
	3
	3
	3
	3
	3
	3
	3
	3
	3
	3
	3
	3
	3
	3
	3
	3
	3
	3
	3
	3
	3
	3
	3
	3
	3
	3
	3
	3
	3
	3
	3
	3
	3
	3
	3
	3
	3
	3
	3
	3
	3
	3
	3
	3
	3
	3
	3
	3
	3
	3
	3
	3
	3
	3
	3
	3
	3
	3
	3
	3
	3
	3
	3
	3
	3
	3
	3
	3
	3
	3
	3
	3
	3
	3
	3
	4
	4
	4
	4
	4
	4
	4
	4
	4
	4
	4
	4
	4
	4
	4
	4
	4
	4
	4
	4
	4
	4
	4
	4
	4
	4
	4
	4
	4
	4
	4
	4
	4
	4
	4
	4
	4
	4
	4
	4
	4
	4
	4
	4
	4
	4
	4
	4
